# Supplementary material for: A diphenylacrylonitrile conjugated porphyrin with near-infrared emission by AIE–FRET
Source: Royal Society of Chemistry journal article supplement (doi:10.1039/c8nj05785k), 2019-01-01
Supplement: c8nj05785k1.pdf [file c8nj05785k1.pdf]

## ***Supporting Information***

### **Diphenylacrylonitrile conjugated porphyrin with Near-infrared emission by AIE-FRET**

Chenyang Han,<sup>a</sup> Shengjie Jiang,<sup>a</sup> Jiabin Qiu,<sup>a</sup> Hongyu Guo,<sup>\*a</sup> and Fafu Yang,<sup>\*a,b</sup>

*a* College of Chemistry and Materials Science, Fujian Normal University, Fuzhou 350007, P. R. China;

Email: [yangfafu@fjnu.edu.cn](mailto:yangfafu@fjnu.edu.cn); *b* Fujian Key Laboratory of Polymer Materials, Fuzhou 350007, P. R.

China.

#### **1. General**

All chemical reagents were obtained from commercial suppliers and used without further purification. The other organic solvents and inorganic reagents were purified according to standard anhydrous methods before use. TLC analysis was performed by using pre-coated glass plates. Column chromatography was carried out by using silica gel (200-300 mesh). NMR spectra were recorded in CDCl<sub>3</sub> on a Bruker-ARX 400 instrument at 25°C. Chemical shifts are reported in ppm, using tetramethylsilane (TMS) as internal standard. MS spectra were obtained from Bruker mass spectrometer.

UV-Vis spectra were recorded on Varian UV-Vis spectrometer. Fluorescence spectra were measured in a conventional quartz cell (10×10×45 mm) at 25°C on an Edinburgh Instruments FS5 spectrometer with excitation slits 1.8 nm wide and emission slits 0.9 nm wide. The fluorescence absolute  $\Phi_F$  values were obtained on an Edinburgh Instruments FLS920 Fluorescence Spectrometer with a 6-inch integrating sphere. FT-IR spectra were obtained with samples in KBr matrix on a Thermo Scientific Nicolet 6700 FT-IR Spectrometer. Compounds **1**, **2** and **3** were prepared by reported method (Org. Biomol. Chem., 2017, 15, 6006-6013).



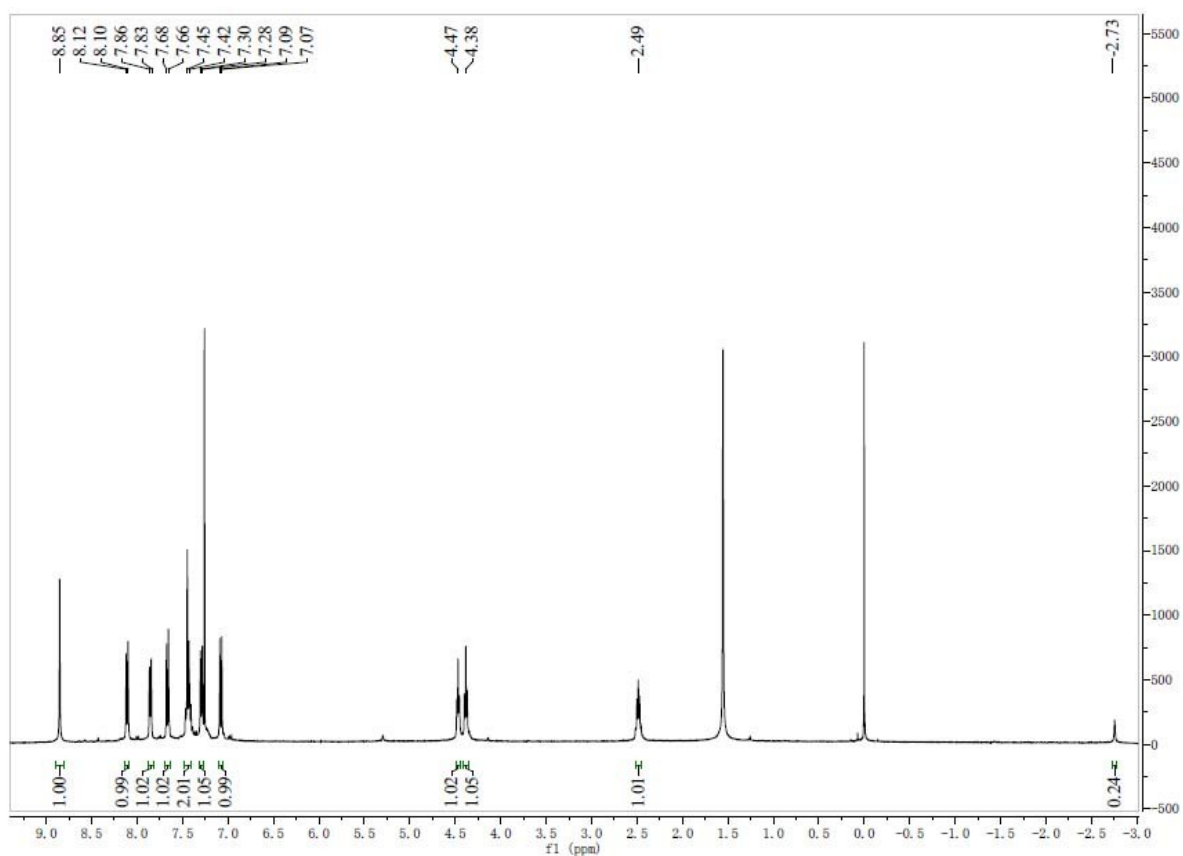

Figure S1. The <sup>1</sup>H NMR spectrum of compound **4**

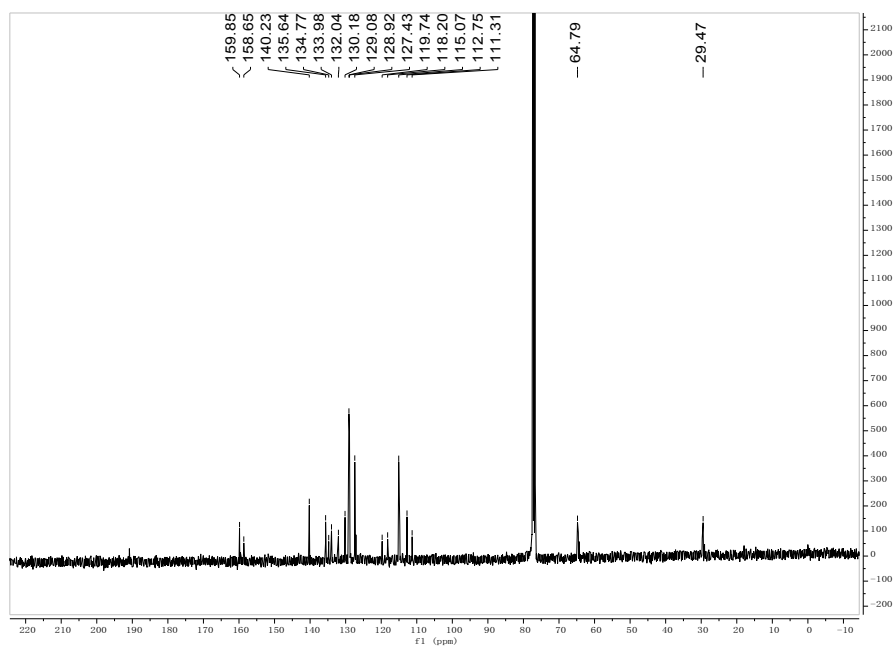

Figure S2. The <sup>13</sup>C NMR spectrum of compound **4**

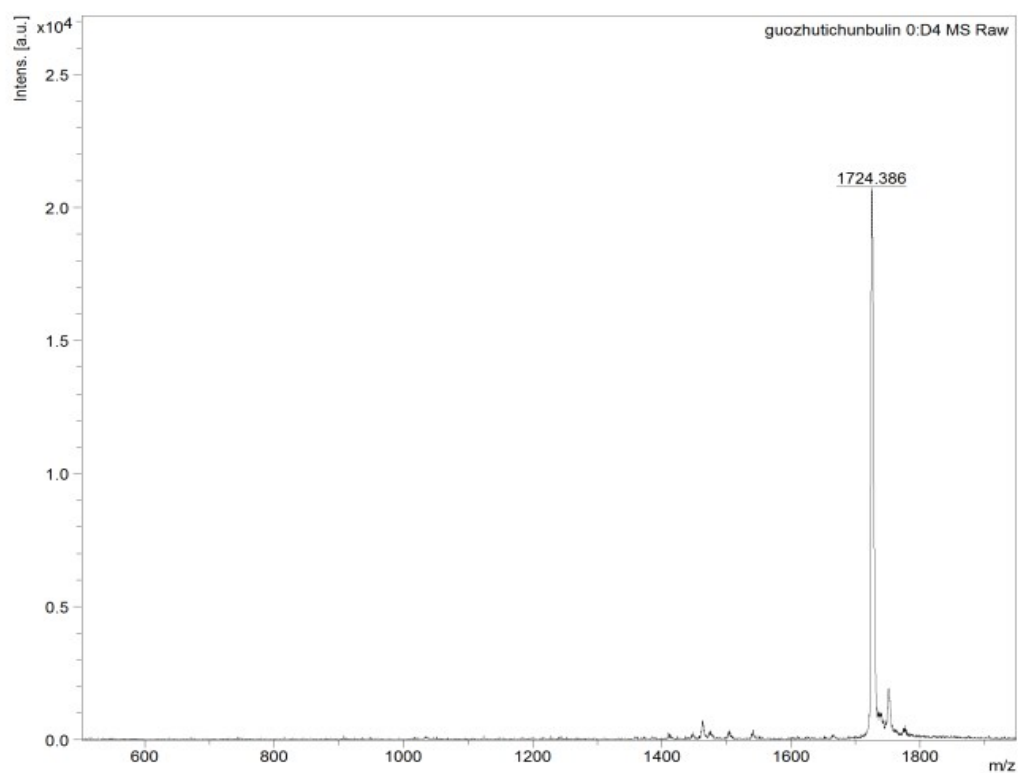

Figure S3. The MALDI-TOF-MS spectrum of compound **4**

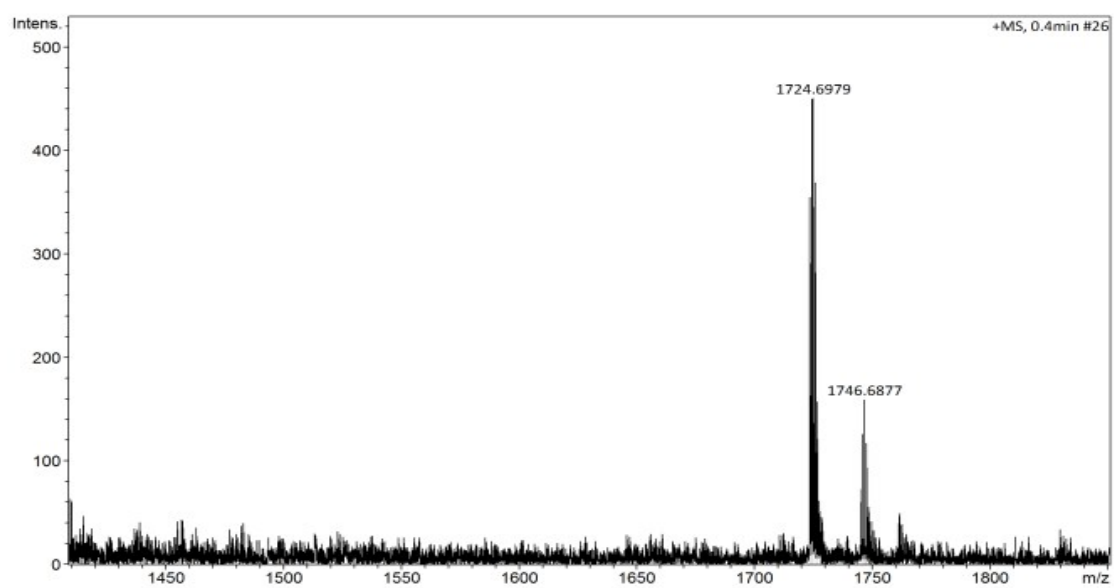

Figure S4. The The HR-MS spectrum of compound **4**

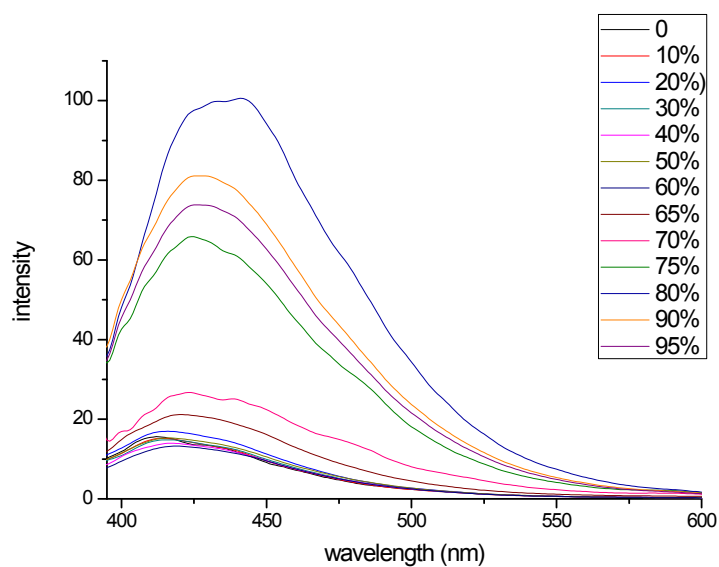

Figure S5 The fluorescence spectra of compound **3** with different fractions of H<sub>2</sub>O in THF/H<sub>2</sub>O mixtures ( $1 \times 10^{-5}$  M,  $\lambda_{\text{ex}} = 330$  nm).

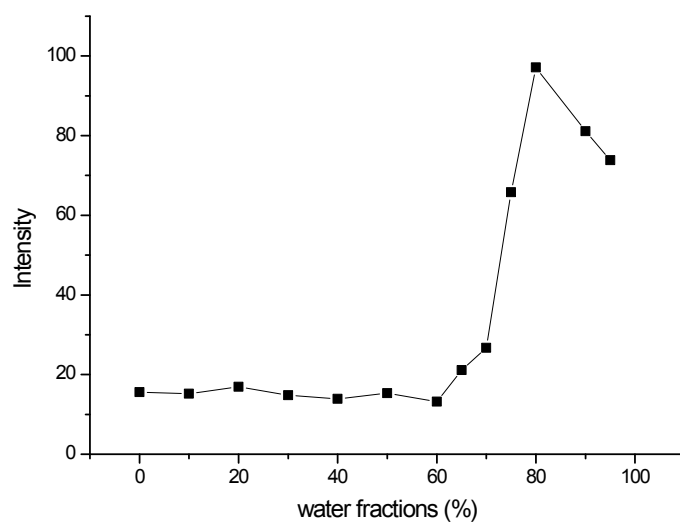

Figure S6 The line plot of fluorescence intensity change from 0-95% water fractions of sample **3**

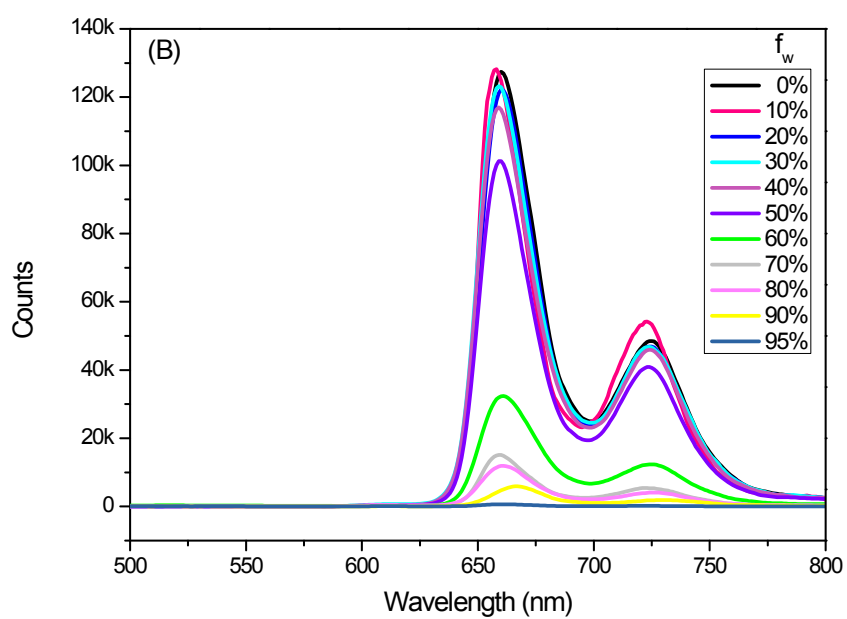

Figure S7 The fluorescence spectra of compound **5** with different fractions of H<sub>2</sub>O in THF/H<sub>2</sub>O mixtures ( $1 \times 10^{-5}$  M,  $\lambda_{\text{ex}} = 420$  nm).

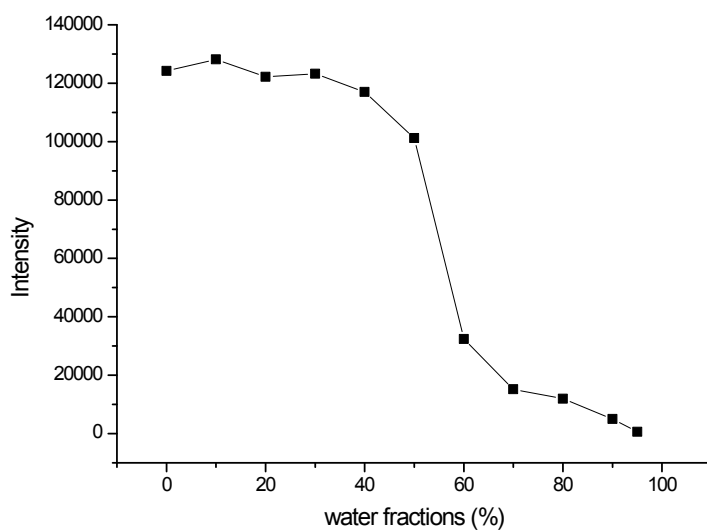

Figure S8 The line plot of fluorescence intensity change from 0-95% water fractions of sample **5**
